# Supplementary material for: Ferromagnetic hematite@graphene nanocomposites for removal of rhodamine B dye molecules from water
Source: Royal Society of Chemistry journal article supplement (doi:10.1039/c2ce25578b), 2012-01-01
Supplement: c2ce25578b.pdf [file c2ce25578b.pdf]

Electronic Supplementary Information (ESI) for

## **Ferromagnetic hematite@graphene nanocomposites for removal of rhodamine B dye molecules from water**

Junkun Liu,<sup>a,b</sup> Huaqiang Cao,<sup>\*b</sup> Jinping Xiong <sup>\*a</sup> and Ziyang Cheng

<sup>a</sup>*College of Materials Science and Engineering, Beijing University of Chemical Technology, Beijing 100029, PR China*

<sup>b</sup>*Department of Chemistry, Tsinghua University, Beijing 100084, P R China*

<sup>c</sup>*College of Chemistry and Chemical Engineering, Tianjin University of Technology, Tianjin 300191, PR China.*

\*Corresponding author. E-mail: hqcao@mail.tsinghua.edu.cn & xiongjp@mail.buct.edu.cn

### **Experimental Section**

**Synthesis of graphene oxide (GO):** GO was synthesized using a modified Hummer's method.<sup>S1</sup> In a typical case, 0.5 g NaNO<sub>3</sub> was dissolved in 23 ml of concentrated H<sub>2</sub>SO<sub>4</sub>, then 1 g graphite powder was added into above mixture with stirring for 10 min and cooling in an ice bath condition. The mixture was continuously stirred while 3 g KMnO<sub>4</sub> was added slowly for 10 min, then the above mixture was still stirring for 2 h at room temperature after removing it out of the ice bath, followed by adding 46 ml deionized water while stirring without intermitting, and the temperature will rise up to 98 °C and keeping stirring in hot water bath for 15 min. Then the mixture was got rid of the hot-water bath, and 140 ml deionized water was added with stirring for 10 min and then 10 ml 30% H<sub>2</sub>O<sub>2</sub> were added in sequence. The oxidized material was then washed with 1:10 (v:v) HCl solution 440 ml and deionized water one time to remove metal ions, followed by filtration. The collected product was dried in a vacuum drying oven at 50 °C for 6 h. The GO was obtained thereafter.

**Synthesis of  $\alpha$ -Fe<sub>2</sub>O<sub>3</sub>-Polyvinylpyrrolidone (PVP) modified Graphene oxide (GO) nanocomposite:** 25 mg GO was added into 25 ml deionized water, followed by ultrasonic treatment for 2h. 169 mg FeCl<sub>3</sub>·6H<sub>2</sub>O (0.625 mmol) was dissolved in 15 ml deionized water, followed by adding 112.5 mg urea (AR, 99%, Beijing Modern Orient fine chemistry reagent Ltd.) and 62.5 mg polyvinylpyrrolidone (PVP) (Mw =40000, Beijing Kebio Biotechnology Co., Ltd.) with stirring and then the solution was added dropwise into GO dispersed system with stirring for 4 h, followed by transferring to and sealing in a Teflon-lined autoclave, heated to 180 °C, and maintained at this temperature for 24 h. After the autoclave was cooled down to room temperature naturally, the products were collected by washing with deionized water, followed by drying at 80 °C for 4h. We can obtain black power.

**Synthesis of  $\alpha$ -Fe<sub>2</sub>O<sub>3</sub>@Polyvinylpyrrolidone (PVP)@reduced Graphene Oxide (rGO) (termed as HPG):**The as-obtained black power was ground and redispersed in deionized water (40 ml), 1 ml hydrazine hydrate (NH<sub>2</sub>-NH<sub>2</sub>·H<sub>2</sub>O, AR, 80%, Beijing Chemical Works) was added into the above mixture, followed by transferring to and sealing in a Teflon-lined autoclave, heated to 140 °C, and maintained at this temperature for 12 h. After the autoclave was cooled down to room

temperature naturally, the products were collected by washing with deionized water, and then drying at 80°C for 2h. The black power was  $\alpha$ -Fe<sub>2</sub>O<sub>3</sub>@PVP@rGO (termed as HPG).

**Characterization:** The morphology was studied by Transmission electron microscopy (TEM) was carried out on a Hitachi H-7650B instrument, operating at 120 kV. The phase structure was studied by X-ray diffractometer (Druker D8 Advance) with Cu K $\alpha$  radiation ( $\lambda = 154056 \text{ \AA}$ , operating at 40 kV $\times$ 40 mA). Raman spectra (Renishaw, RM 1000) were measured with excitation from the 514 nm line of an Ar ion laser with a power of about 5 mW. Fourier transform infrared (FT-IR) spectra were obtained on a Nicolet 560 FT-IR spectrophotometer. X-ray photoelectron spectra (XPS) were recorded on a PHI quantera SXM with an Al K $\alpha = 280.00 \text{ eV}$  excitation source, where the binding energies were calibrated by referencing the C1s peak to reduce the sample charge effect. Magnetic properties of the sample were studied by using a Physical Property Measurement System (PPMS-9T) with temperature capabilities of 10-300 K and magnetic field up to 500 Oe for measuring the magnetization.

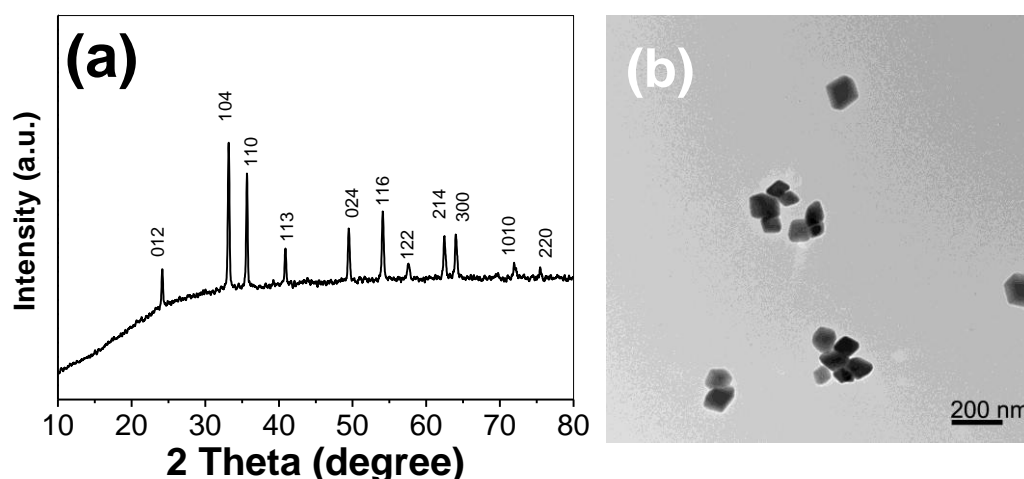

**Figure S1.** (a) XRD pattern, and (b) TEM image of pure  $\alpha$ -Fe<sub>2</sub>O<sub>3</sub> nanocubes.

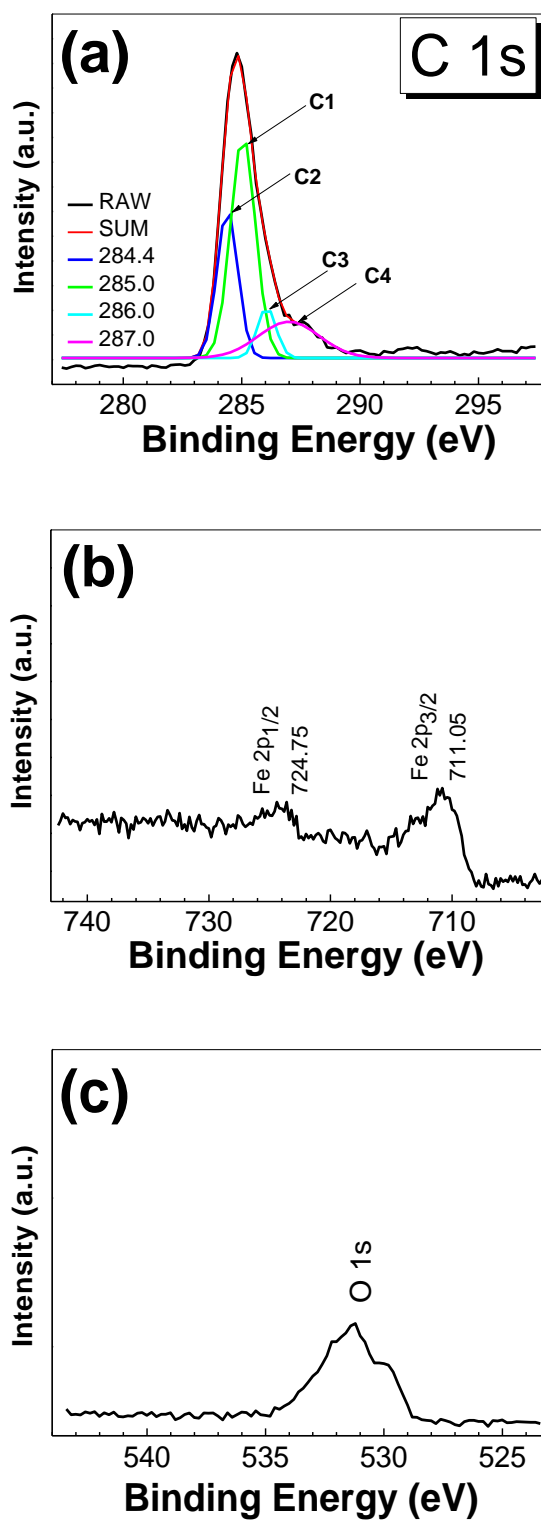

**Figure S2.** XPS spectra of (a) C1s, (b) Fe 2p, (c) O1s.

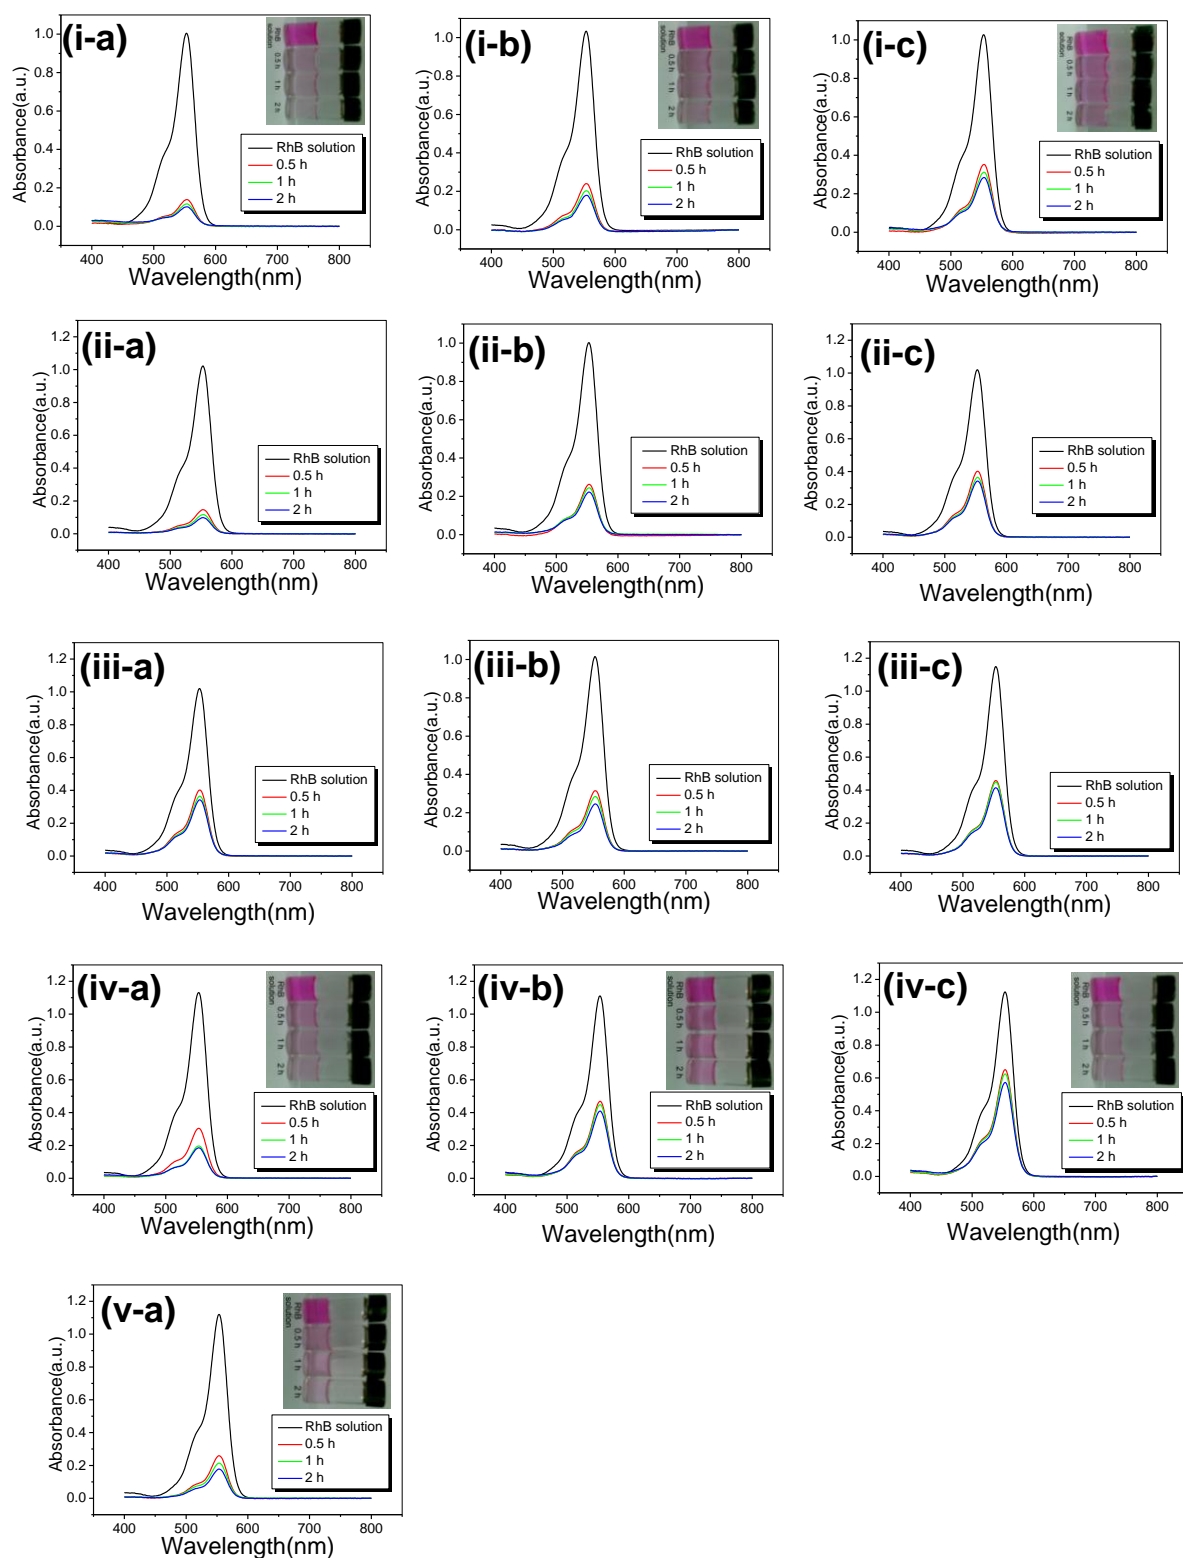

**Figure S3.** UV-vis absorption spectra of HPG in RhB solution in various cycles: (i) 1<sup>st</sup> cycle, (ii) 2<sup>nd</sup> cycle, (iii) 3<sup>rd</sup> cycle, (iv) 4<sup>th</sup> cycle, and (v) 5<sup>th</sup> cycle, respectively. Insets are corresponding photos.

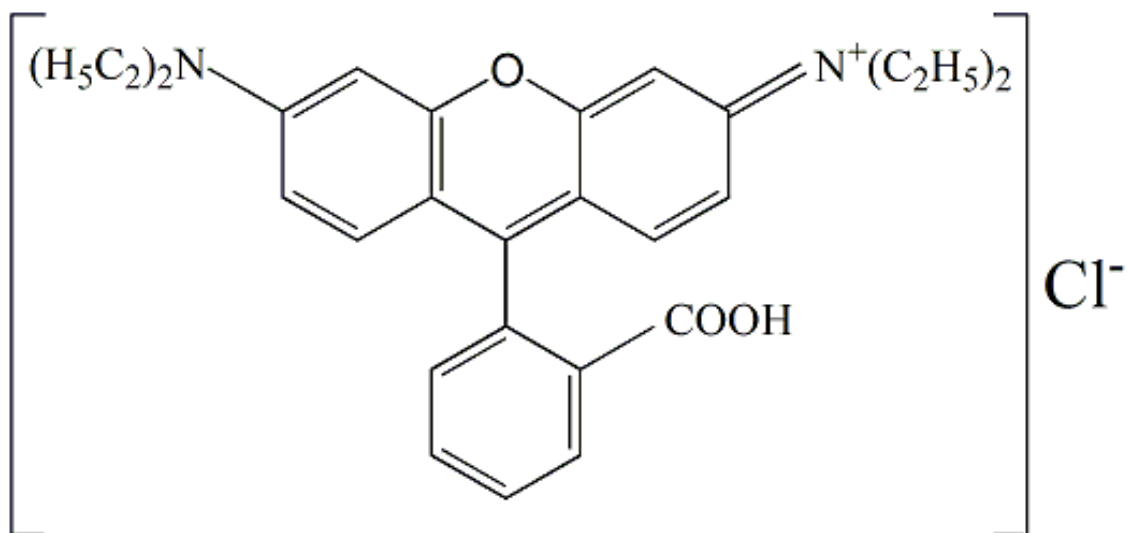

**Figure S4.** The molecule structure of RhB.

Reference

S1 B. Li, H. Cao, J. Shao, G. Li, M. Qu, G. Yin, *Inorg. Chem.*, 2011, **50**, 1628.
